# Supplementary material for: Nonalternating purine pyrimidine sequences can form stable left-handed DNA duplex by strong topological constraint
Source: PubMed Central journal article supplement — Nucleic Acids Res. 2021 Dec 30;50(2):684–96. doi: 10.1093/nar/gkab1283 (PMC8789069; doi:10.1093/nar/gkab1283), 2021-12-30
Supplement: gkab1283_supplemental_file.pdf [file gkab1283_supplemental_file.pdf]

## SUPPORTING INFORMATION

For

### **Nonalternating purine pyrimidine sequences can form stable left-handed DNA duplex by strong topological constraint**

Lin Li<sup>1</sup>, Yaping Zhang<sup>1,§</sup>, Wanzhi Ma<sup>1</sup>, Hui Chen<sup>1</sup>, Mengqin Liu<sup>1</sup>, Ran An<sup>1,2</sup>, Bingxiao Cheng<sup>1</sup>, Xingguo Liang<sup>1,2,\*</sup>

1 College of Food Science and Engineering, Ocean University of China, Qingdao 266003, China

2 Laboratory for Marine Drugs and Bioproducts, Qingdao National Laboratory for Marine Science and Technology, Qingdao 266235, China

§ Present Address: State Key Laboratory of Chemical Oncogenomics, The School of Chemical Biology and Biotechnology, Peking University, Shenzhen Graduate School, Shenzhen 518055, China

\*To whom correspondence should be addressed. Tel: +86 532 82031086; Fax: +86 532 82031086; Email: liangxg@ouc.edu.cn.

**Table S1.** The sequences of 74 bp, 92 bp, and 109 bp

| Name                 | Sequences (5'→3')                                                                                                  | Length (nt) |
|----------------------|--------------------------------------------------------------------------------------------------------------------|-------------|
| Is74 $\alpha_0$      | AGGATCAGAGTGAGAGTTAGAGAGAGACGTTACATCAGGTACGTGTACATATACAT<br>ACGCATGCGCATGCACAG                                     | 74          |
| Is74 $\beta_0$       | ATGTAACGTCTCTCTCTAACTCTCACTCTGATCCTCTGTGCATGCGCATGCGTATGTA<br>TATGTACACGTACCTG                                     | 74          |
| Sp74 $\alpha_0$      | CTGATCCT CTGTGCAT                                                                                                  | 16          |
| Sp74 $\beta_0$       | CGTTACATCAGGTACG                                                                                                   | 16          |
| Is74 $\alpha_1$      | AGCTAGAGCAGAGCAGGAATTCAGAGTGAGAGAGCGAGAGGATCAGAGTGAGAG<br>TTAGAGAGAGACGTTACATC                                     | 74          |
| Is74 $\beta_1$       | ATGTAACGTCTCTCTCTAACTCTCACTCTGATCCTCTCGCTCTCTCACTCTGAATTCC<br>TGCTCTGCTCTAGCTG                                     | 74          |
| Sp74 $\alpha_1$      | CTCTAGCTGATGTAAC                                                                                                   | 16          |
| Sp74 $\beta_1$       | TTACATCAGCTA                                                                                                       | 12          |
| Is74 $\alpha_{1-20}$ | AGCTAGAGCCACAGGACTTAAGTATAAATGAGAGCGAGAGGATCAGAGTGAGAGT<br>TAGAGAGAGACGTTACATC                                     | 74          |
| Is74 $\alpha_{1-35}$ | AGGATATAGCACAGGACTTAAGTATAAATAGACAGATGAGGATCAGAGTGAGAGTT<br>AGAGAGAGACGTTACATC                                     | 74          |
| Sp74 $\alpha_{1-20}$ | CTCTAGCTGATGTAAC                                                                                                   | 16          |
| Sp74 $\alpha_{1-35}$ | TATATCCT GATGTAAC                                                                                                  | 16          |
| Is74 $\alpha_2$      | CGAGAGCAAGAGAGAGGAGAAGATAGAAGAAGAGGAGCGAGGAGGAGAGAAGG<br>AGTGAGAAAAGAAGGGAGTGAA                                    | 74          |
| Is74 $\beta_2$       | TTCCTCCCTTCTTTCTCACTCCTTCTCCTCCTCGCTCCTTCTTCTATCTTCTCC<br>TCTCTTTGCTCTCG                                           | 74          |
| Sp74 $\alpha_2$      | CTTGCTCTCGTTCCTCCCT                                                                                                | 20          |
| Sp74 $\beta_2$       | GGAGTGAACGAGAGCA                                                                                                   | 16          |
| Is74 $\alpha_3$      | AGTTGATATTTTCGCTAAGTGATCTATGAAAGTAAGGTGGCCTCAGACGTTTGAGTCA<br>AGGTGTGAATTCACGGC                                    | 74          |
| Is74 $\beta_3$       | CGTGAATTCACACCTTGACTCAAACGTCTGAGGCCACCTTACTTTTCATAGATCACTT<br>AGCGAAATATCAACTGC                                    | 74          |
| Sp74 $\alpha_3$      | TTCACGGCAGTT                                                                                                       | 12          |
| Sp74 $\beta_3$       | TCAACTGCCGTG                                                                                                       | 12          |
| Is92 $\alpha_A$      | ATATGCCTAGTCTTCCATGACACTGAGACA ACTGGAAACCACTCATGCGT                                                                | 50          |
| Is92 $\alpha_B$      | AGATGCGAACTAGCACAGTGAACCTCATCCACTAGAACTTGAC                                                                        | 42          |
| Is92 $\beta_A$       | GTTTCGCATCTACGCATGAGTGGTTCCAGTTGTCTCAGTGTC                                                                         | 43          |
| Is92 $\beta_B$       | TGGAAGACTAGGCATATGTCAAGTTCTAGTGGATGAGTTCCTGCTGCTA                                                                  | 49          |
| Sp92 $\alpha_A$      | GCATATGTCAAG                                                                                                       | 12          |
| Sp92 $\alpha_B$      | GCATCTACGCAT                                                                                                       | 12          |
| Sp92 $\beta_A$       | GCGAACTAGCAC                                                                                                       | 12          |
| Sp92 $\beta_B$       | CTTCCATGACAC                                                                                                       | 12          |
| Is109 $\alpha$       | GAAGGACCAAGTCTGTCATGCACTGAAATCAGTCTCATTGCTTTATAAACAACCAG<br>CTAAGACACTGCCATACCCTGTAGAACCGAATTTGTGCAGACTCCGGTGGAAT  | 109         |
| Is109 $\beta$        | ATTCCACCGGAGTCTGCACAAATTCGGTTCTACAGGGTATGGCAGTGTCTTAGCTG<br>GTTGTTTATAAAGCAATGAGACTGATTTTCAGTGCATGACAGACTTGGTCCTTC | 109         |
| Sp109 $\alpha$       | GTCCTTCATTCCAC                                                                                                     | 14          |
| Sp109 $\beta$        | GTGGAATGAAGGAC                                                                                                     | 14          |

**Table S2.**  $T_{ms}$  (°C) for LR-chimera and Ic in various concentrations of MgCl<sub>2</sub> and KCl\*

| <b>MgCl<sub>2</sub> (mM)</b><br><b>DNA</b> | <b>10</b>   | <b>2.5</b>  | <b>1.0</b>  | <b>140 mM KCl</b> |
|--------------------------------------------|-------------|-------------|-------------|-------------------|
| <b>cc-74<sub>0</sub></b>                   | <b>67.4</b> | <b>66.3</b> | <b>65.3</b> | <b>54.7</b>       |
| <b>Ic-74<sub>0</sub></b>                   | <b>76.3</b> | <b>75.8</b> | <b>75.5</b> | <b>75.9</b>       |
| <b>cc-74<sub>1</sub></b>                   | <b>65.8</b> | <b>65.5</b> | <b>65.0</b> | <b>60.0</b>       |
| <b>Ic-74<sub>1</sub></b>                   | <b>77.6</b> | <b>77.1</b> | <b>76.4</b> | <b>76.2</b>       |
| <b>cc-74<sub>1-20</sub></b>                | <b>61.2</b> | <b>60.7</b> | <b>59.4</b> | <b>50.0</b>       |
| <b>Ic-74<sub>1-20</sub></b>                | <b>72.9</b> | <b>72.3</b> | <b>72.0</b> | <b>71.8</b>       |
| <b>cc-74<sub>1-35</sub></b>                | <b>57.4</b> | <b>55.4</b> | <b>53.4</b> | <b>45.0</b>       |
| <b>Ic-74<sub>1-35</sub></b>                | <b>70.3</b> | <b>69.3</b> | <b>68.5</b> | <b>68.3</b>       |
| <b>cc-74<sub>2</sub></b>                   | <b>72.1</b> | <b>72.2</b> | <b>72.7</b> | <b>63.5</b>       |
| <b>Ic-74<sub>2</sub></b>                   | <b>76.9</b> | <b>76.4</b> | <b>76.3</b> | <b>75.2</b>       |

\*All solutions containing 0.25  $\mu$ M of DNA and 10 mM HEPES (pH7.5).

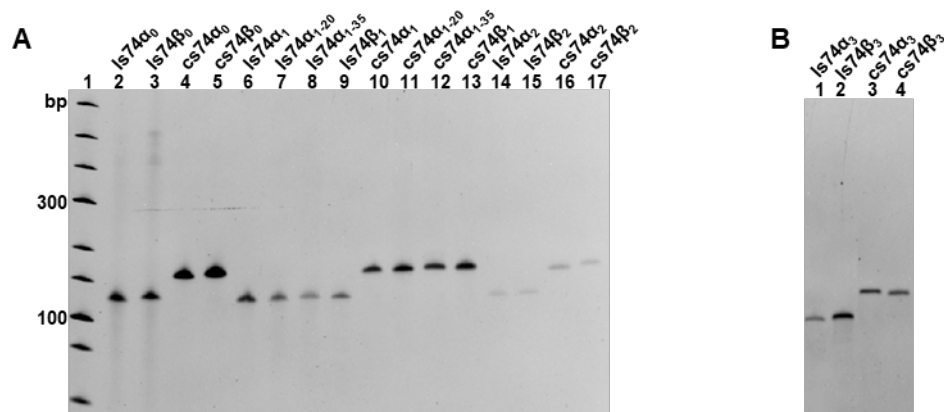

**Figure S1.** Analysis of purified circular ssDNA by PAGE. A) Purified circular ssDNA cs74 $\alpha_0$ , cs74 $\beta_0$ , cs74 $\alpha_{1-20}$ , cs74 $\alpha_{1-35}$ , and cs74 $\beta_2$ . Lanes 2, 3: linear ssDNA Is74 $\alpha_0$ , Is74 $\beta_0$ ; lanes 4, 5: purified circular ssDNA cs74 $\alpha_0$ , cs74 $\beta_0$ ; lanes 6-9: linear ssDNA Is74 $\alpha_1$ , Is74 $\alpha_{1-20}$ , Is74 $\alpha_{1-35}$ , Is74 $\beta_1$ ; lanes 10-13: purified circular ssDNA cs74 $\alpha_1$ , cs74 $\alpha_{1-20}$ , cs74 $\alpha_{1-35}$ , cs74 $\beta_1$ ; lanes 14, 15: linear ssDNA Is74 $\alpha_2$ , Is74 $\beta_2$ ; lanes 16, 17: purified circular ssDNA cs74 $\alpha_2$ , cs74 $\beta_2$ . (8% dPAGE containing 8.0 M urea, lanes 1-13: ssDNA is 2.0 pmol, lanes 14-17: ssDNA is 4.0 pmol). B) Purified circular ssDNA cs74 $\alpha_3$ . Lanes 1, 2: linear ssDNA Is74 $\alpha_3$ , Is74 $\beta_3$ ; lanes 3, 4: purified circular ssDNA cs74 $\alpha_3$ , cs74 $\beta_3$ ;

Fluorescent dyes are difficult to stain ssDNA composed of only purine (A/G) and pyrimidine (C/T), which leads to the single stranded DNA  $\alpha_2$  and  $\beta_2$  bands is not obvious (lanes 14-17). This has been reported previously (Han,X., Wang,E., Cui,Y., Lin,Y., Chen,H., An,R., Liang,X., Komiyama,M. (2019) The staining efficiency of cyanine dyes for single-stranded DNA is enormously dependent on nucleotide composition. *Electrophoresis*, **40**, 1708-1714).

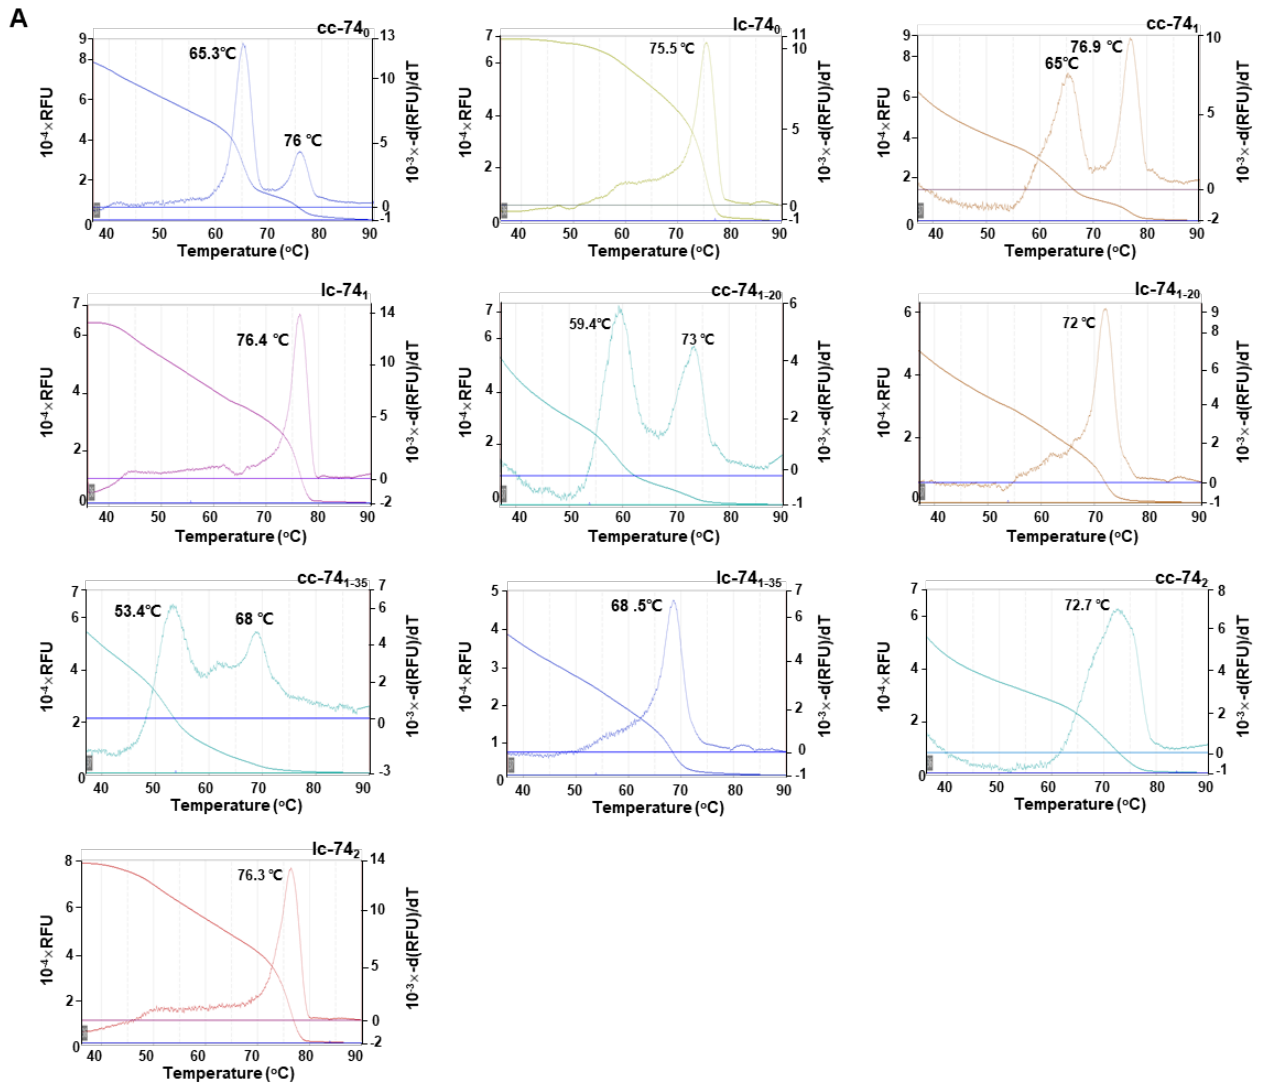

**Figure S2A.**  $T_m$  curves and calculus curves measured by HRM in 1.0 mM  $\text{MgCl}_2$ .  $[\text{dsDNA}] = 0.25 \mu\text{M}$ ,  $[\text{HEPES}] = 10 \text{ mM}$ ,  $\text{pH}7.5$ .

**B**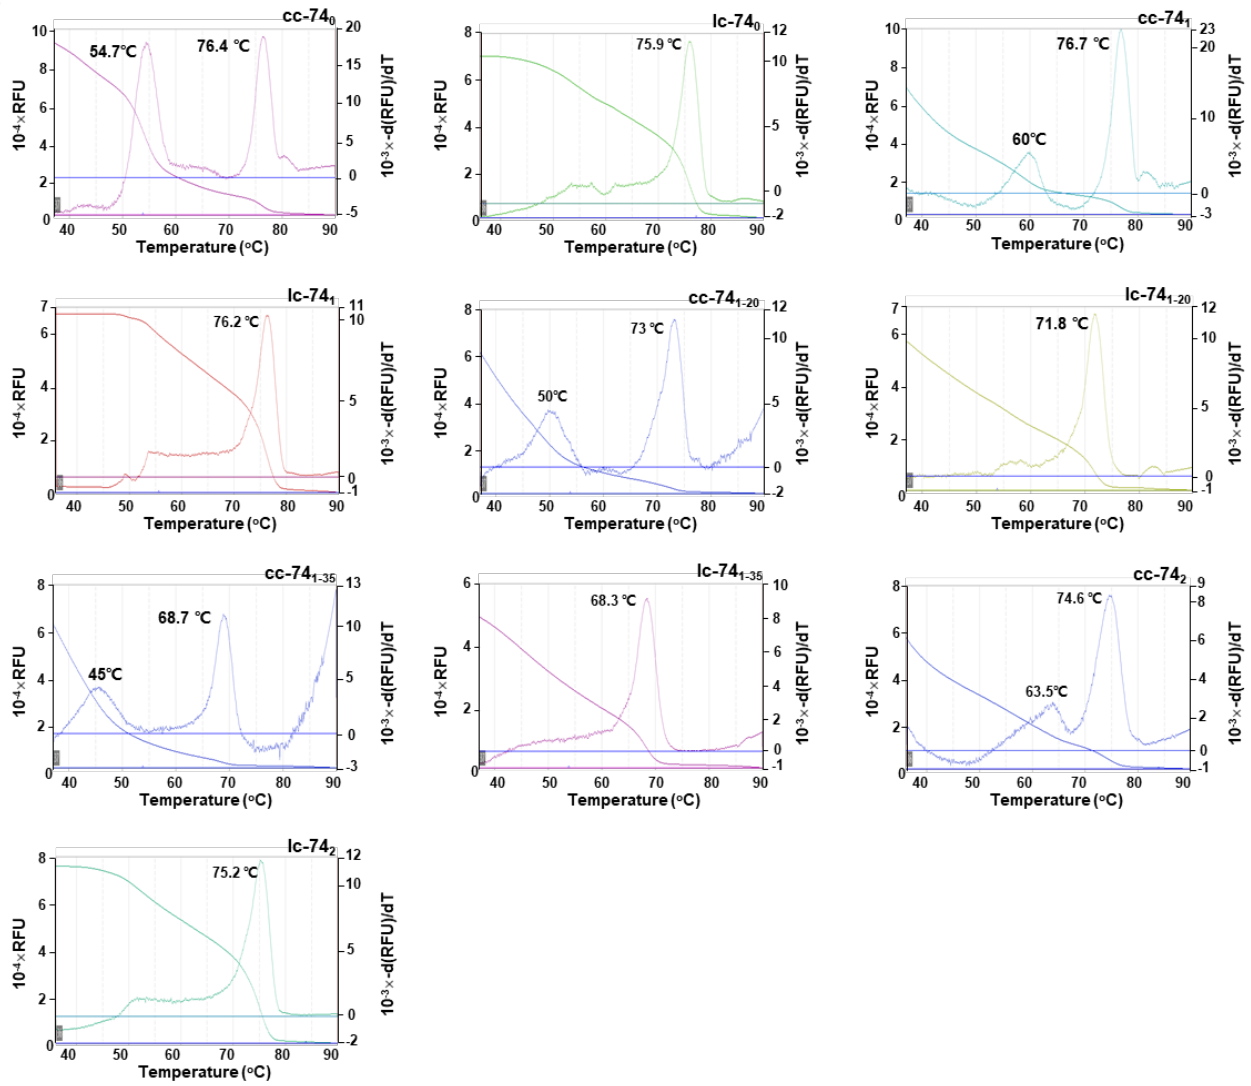

**Figure S2B.**  $T_m$  curves and calculus curves measured by HRM in 140 mM KCl. [dsDNA] = 0.25  $\mu\text{M}$ , [HEPES] = 10 mM, pH7.5.



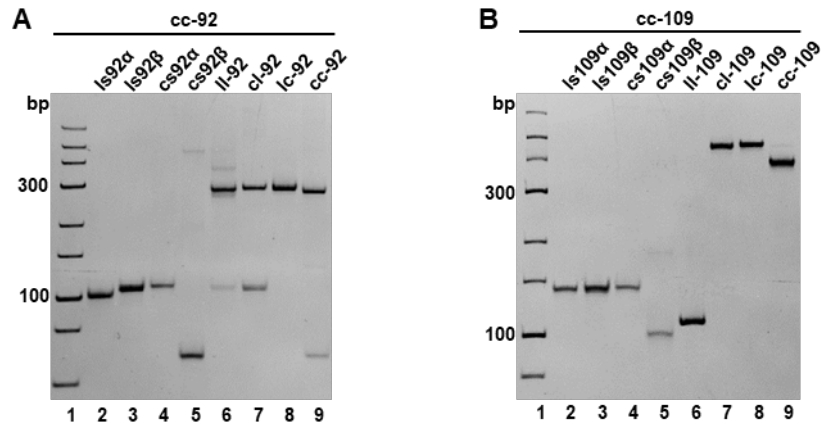

**Figure S4.** PAGE (8%) analysis of hybridization for cc-92 (A) and cc-109 (B), respectively. Name of samples are shown on top of the gel. The abbreviations are shown as follows. Is: linear ssDNA strand; cs: circular ssDNA strand; lc: hybridization of liner  $\alpha$  strand and circular  $\beta$  strand; cl: hybridization of circular  $\alpha$  strand and linear  $\beta$  strand; cc: hybridization of two circular strands. The gels were kept at 20°C during electrophoresis.

After two complementary strands of purified circular ssDNAs were hybridized at ionic strength close to physiological conditions (10 mM HEPES, 10 mM MgCl<sub>2</sub>, pH7.5), the formation of LR-chimera was analyzed by 8% PAGE (Figure S4). As expected, new bands assigned as dsDNA of cc-92 (lane 9, Figure S4A), and cc-109 (lane 9, Figure S4B) were observed, which have similar mobility as the dsDNA formed from the circular ssDNA and its complementary linear one (lanes 7, 8, Figure S4A, S4B). It should be noted that during PAGE analysis, only 89 mM Tris-H<sub>3</sub>BO<sub>4</sub> and no MgCl<sub>2</sub> were present, indicating that the formed cc-92 and cc-109 were even stable under these low ionic strength conditions.



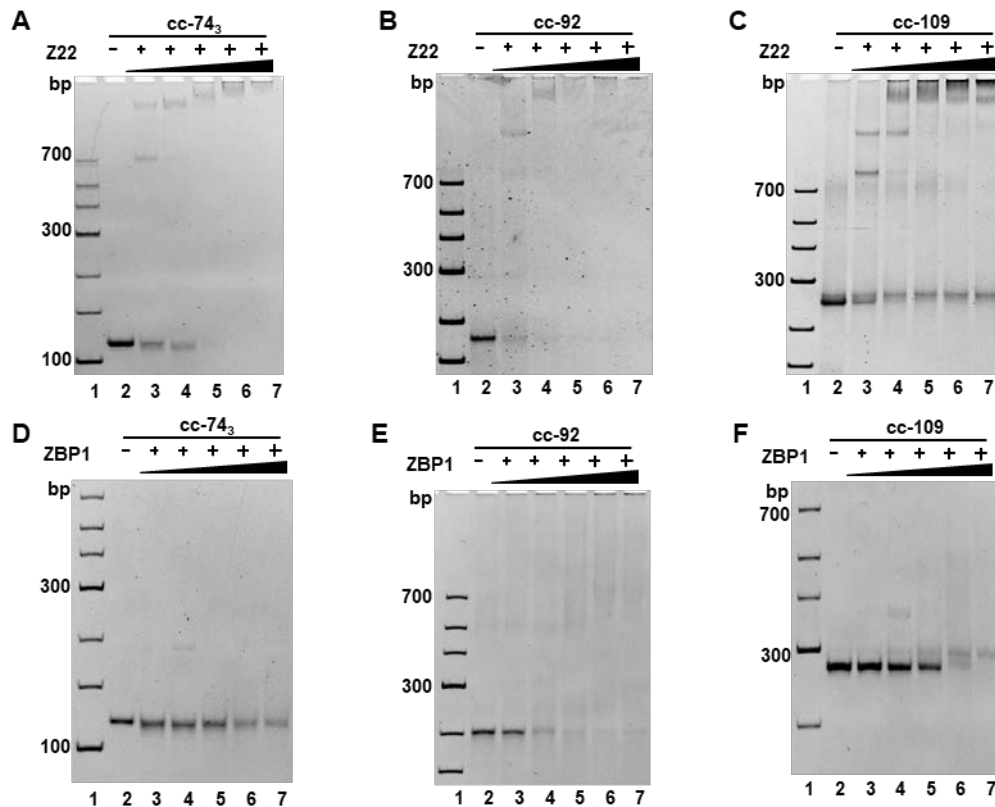

**Figure S5.** Gel shift assay for binding of Z22 (Z-DNA-specific antibody) and ZBP1 to LR-chimera of various sequences. A) Z22 to cc-74<sub>3</sub>; B) Z22 to cc-92; C) Z22 to cc-109; D) ZBP1 to cc-74<sub>3</sub>; E) ZBP1 to cc-92; F) ZBP1 to cc-109. 0.25  $\mu\text{M}$  of LR-chimeras was used. For A-C) 0.25, 0.5, 0.75, 1.0, and 1.25  $\mu\text{M}$  of Z22 were used; For D-F) 0.25, 0.625, 1.25, 1.875, and 2.5  $\mu\text{M}$  of ZBP1 were used. The gel of cc-74<sub>3</sub> (A, C) was kept at 10°C during running the gel, the gel of cc-92 (B, E) and cc-109 (C, F) was kept at 20°C during running the gel.

The results of Z22 (0.25, 0.5, 0.75, 1.0, 1.25  $\mu\text{M}$ ) binding to cc-74<sub>3</sub>, cc-92, and cc-109 (0.25  $\mu\text{M}$ ) in 1 $\times$ HEPES buffer (10 mM HEPES, 10 mM MgCl<sub>2</sub>, pH7.5) are shown in Figure S5A-C. The band for cc-74<sub>3</sub> (Figure S5A), cc-92 (Figure S5B), and cc-109 (Figure S5C) disappeared gradually with the increase of Z22 concentration, and new bands were observed, indicating that Z22 binds strongly. Indicating that Z-conformation formed in both cc-74<sub>3</sub>, cc-92, and cc-109. When another Z-DNA binding protein ZBP1 was used, similar results were obtained but with weaker binding activities (Figure S5D-F). Also suggesting that Z-DNA-like conformation formed in cc-74<sub>3</sub>, cc-92, and cc-109.

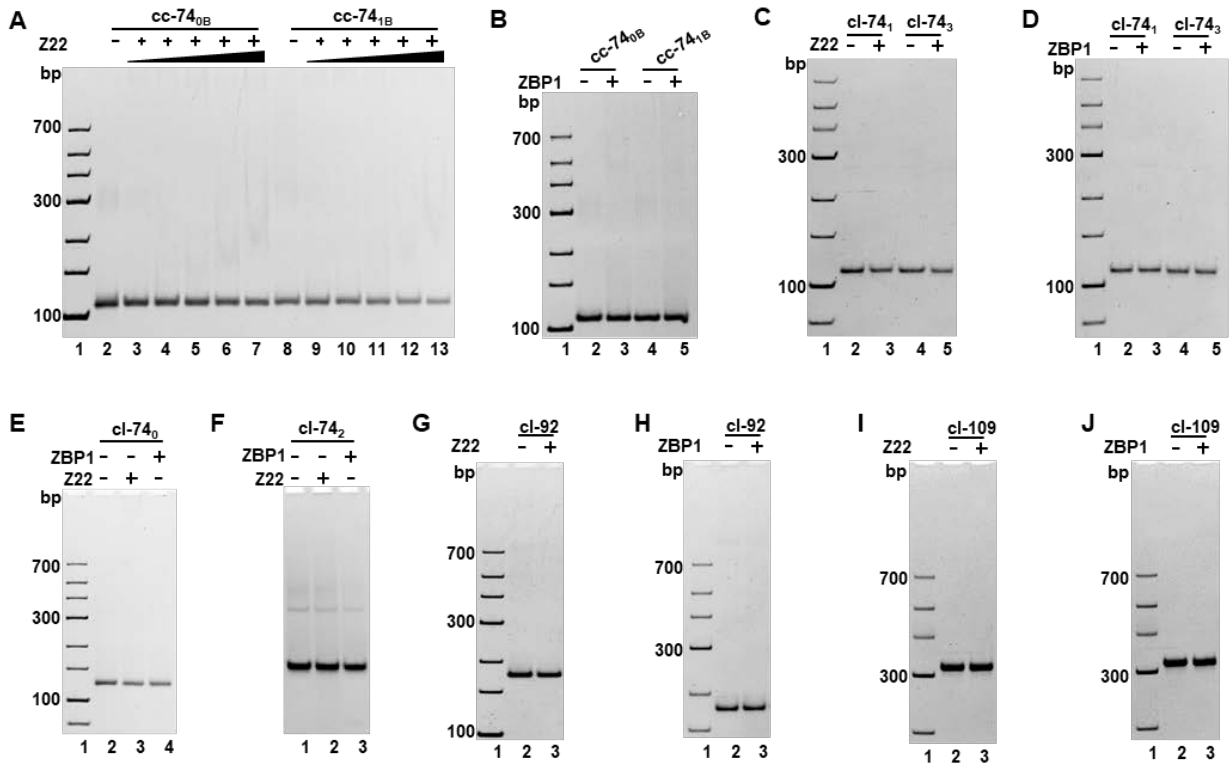

**Figure S6.** Gel shift assay for binding of Z22 (Z-DNA-specific antibody) and ZBP1 to B-form cc and cl (hybridization of circular  $\alpha$  strand and linear  $\beta$  strand) of various sequences. A) Z22 to cc-74<sub>0B</sub> and cc-74<sub>1B</sub>; B) ZBP1 to cc-74<sub>0B</sub> and cc-74<sub>1B</sub>; C) Z22 to cl-74<sub>1</sub> and cl-74<sub>3</sub>; D) ZBP1 to cl-74<sub>1</sub> and cl-74<sub>3</sub>; E) Z22 and ZBP1 to cl-74<sub>0</sub>; F) Z22 and ZBP1 to cl-74<sub>2</sub>; G) Z22 to cl-92; H) ZBP1 to cl-92; I) Z22 to cl-109; J) ZBP1 to cl-109. In A), the concentrations of cc-74<sub>0B</sub> and cc-74<sub>1B</sub> were 0.25  $\mu$ M, the Z22 were 0.25, 0.5, 0.75, 1.0 and 2.5  $\mu$ M, respectively. In B-J), the concentrations of DNA, Z22, and ZBP1 were 0.25  $\mu$ M, 1.25  $\mu$ M, and 2.5  $\mu$ M, respectively. The gel for cc-74<sub>0B</sub>, cc-74<sub>1B</sub>, cl-92 and cl-109 (A, B, G-J) were kept at 20°C during running the gel. The gel for cl-74<sub>0</sub>, cl-74<sub>1</sub>, cl-74<sub>2</sub>, and cl-74<sub>3</sub> (C-F) were kept at 10°C during running the gel.

For cc-74<sub>0B</sub> and cc-74<sub>1B</sub> (0.25  $\mu$ M), almost no binding was observed even for 1.25  $\mu$ M of Z22 and 2.5  $\mu$ M of ZBP1 (Figure S6A, S6B). For cl-74, cl-92, and cl-109 (0.25  $\mu$ M) without topological constraint, no binding was observed even for 1.25  $\mu$ M of Z22 (Figure S6C, S6E, S6F, S6G, S6I). Similarly, no binding was observed even for 2.5  $\mu$ M of ZBP1 to cl-74, cl-92, and cl-109 (0.25  $\mu$ M) (Figure S6D-F, S6H, S6J).

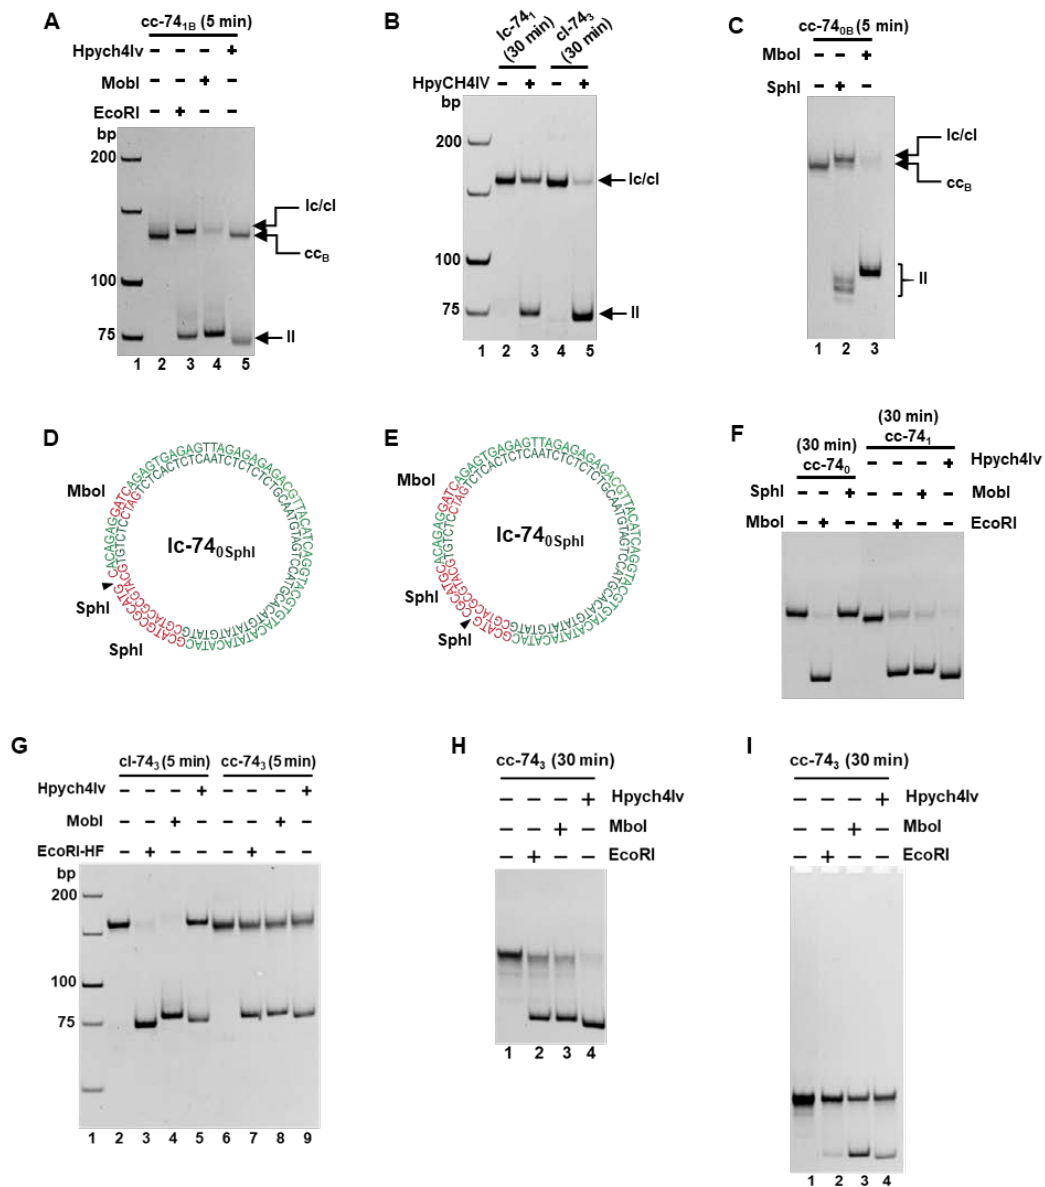

**Figure S7.** Analysis of the positions of left-handed DNA in the LR-chimeras by restriction enzyme cleavage (8% PAGE). A) Cleavage (5 min) of cc-74<sub>1B</sub>. Lane 2: cc-74<sub>1B</sub>; lanes 3-5: cc-74<sub>1B</sub> cleaved by EcoRI, Mbol, and Hpych4Iv, respectively. B) Cleavage (30 min) by Hpych4Iv using Ic-74<sub>1</sub> and Ic-74<sub>3</sub> with a nick. Lane 2: Ic-74<sub>1</sub>; lane 3: Hpych4Iv digestion of Ic-74<sub>1</sub>; lane 4: Ic-74<sub>3</sub>; lane 5: Hpych4Iv digestion of Ic-74<sub>3</sub>. C) Cleavage (5 min) of cc-74<sub>0B</sub>. Lane 1: cc-74<sub>0B</sub>; lanes 2 and 3: cc-74<sub>0B</sub> cleaved by SphI and Mbol, respectively. D and E) Schematic illustration of the product Ic-74<sub>0</sub>SphI from cc-74<sub>0B</sub> cleaved by SphI. F) Cleavage (30 min) of cc-74<sub>0</sub> and cc-74<sub>1</sub>. Lane 1: cc-74<sub>0</sub>; lanes 2 and 3: cc-74<sub>0</sub> cleaved by Mbol and SphI, respectively; lane 4: cc-74<sub>1</sub>; lanes 5-7: cc-74<sub>1</sub> cleaved by EcoRI, Mbol, and Hpych4Iv, respectively. G) Cleavage (5 min) of Ic-74<sub>3</sub> and cc-74<sub>3</sub>. Lane 2: Ic-74<sub>3</sub>; lanes 3-5: Ic-74<sub>3</sub> cleaved by EcoRI, Mbol, and Hpych4Iv, respectively; lane 6: cc-74<sub>3</sub>; lanes 7-9: cc-74<sub>3</sub> cleaved by EcoRI, Mbol, and Hpych4Iv, respectively. H) Cleavage (30 min) of cc-74<sub>3</sub>. Lane 1: cc-74<sub>3</sub>; lanes 2-4: cc-74<sub>3</sub> cleaved EcoRI, Mbol, and Hpych4Iv, respectively. I) Cleavage (30 min) of cc-74<sub>3</sub> after binding to Z22. Lane 1: control of cc-74<sub>3</sub> without RE; lanes 2-4: cleavage by EcoRI, Mbol, and Hpych4Iv, respectively.

Cleavage results of lc-74<sub>3</sub> and cc-74<sub>3</sub> (almost no APP sequences) by EcoRI, Mbol, and Hpych4lv (5 min) are shown in Figure S7G. For EcoRI and Mbol, almost all lc-74<sub>3</sub> disappeared (lanes 3 and 4), and about 50% of cc-74<sub>3</sub> still existed (lanes 7 and 8). For Hpych4lv, about 60% of lc-74<sub>3</sub> and cc-74<sub>3</sub> were remaining (lanes 5 and 9). When the cleavage time is extended to 30 min (Figure S7H), EcoRI and Mbol cleaved about 80% of cc-74<sub>3</sub> into linear dsDNA (lanes 2 and 3), but almost no cc-74<sub>3</sub> was left for Hpych4lv (lane 4). Above the results suggest that the recognition sites for EcoRI and Mbol may be prefer to form lh-DNA. To clarify this, effect of Z22 binding on cleavage of cc-74<sub>3</sub> by REs was further investigated (Figure S7I). The results showed that, even after 30 min, EcoRI, Mbol, and Hpych4lv cleaved about 5%, 40% and 20% of cc-74<sub>3</sub>, respectively. Obviously, Z22 binding affects greatly the activity of cc-74<sub>3</sub> cleavage by all these three REs. Accordingly, the recognition site of EcoRI may prefer to form lh-DNA.
